# Supplementary material
Source: publisher figshare collection journal article supplement (https://karger.figshare.com/articles/dataset/_/5129440)
Supplement: Supplementary file 1 [file 1 › 000444125_sm_Figures.pdf]

# Supp. Figure 1

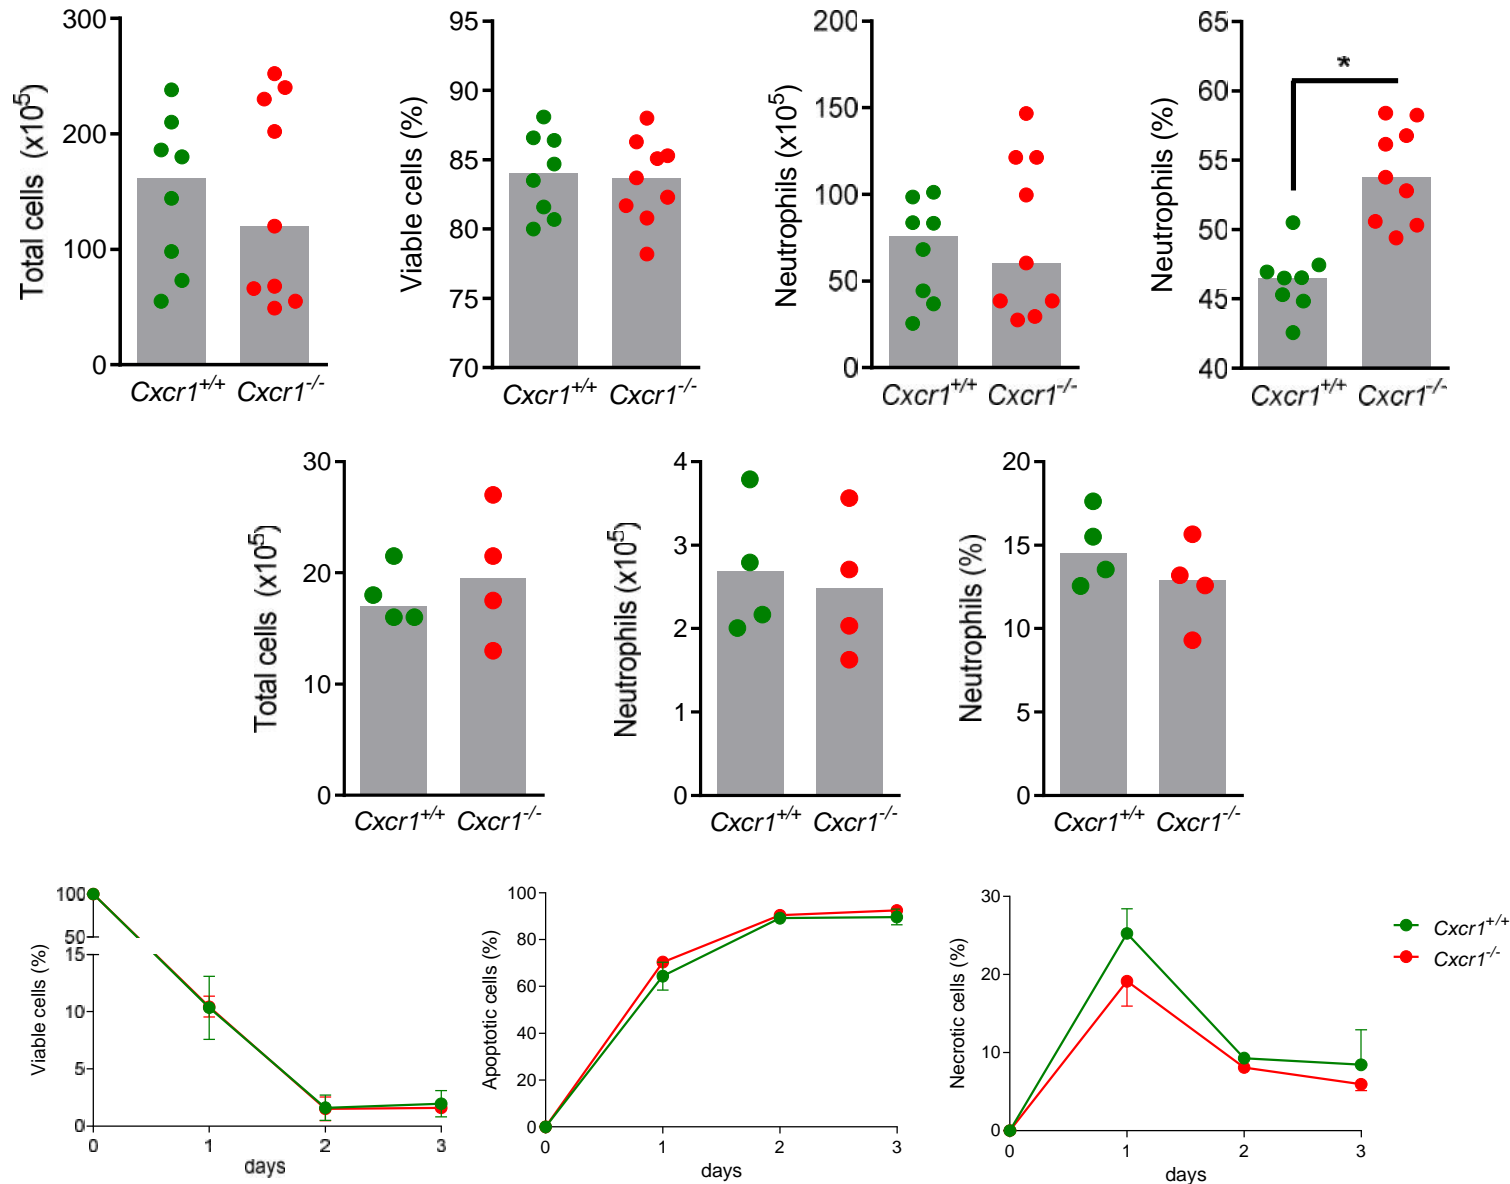

**Supplementary Figure 1: Leukocyte homeostasis and neutrophil survival**

(Upper panel) Cell counts in bone marrow (per femur) of age- and sex-matched *Cxcr1*<sup>+/+</sup> and *Cxcr1*<sup>-/-</sup> mice. (Middle panel) Cell counts in blood of age- and sex-matched *Cxcr1*<sup>+/+</sup> and *Cxcr1*<sup>-/-</sup> mice. All bars represent medians. (Lower panel) Survival (left panel), apoptosis (middle panel) and necrosis (right panel), as assessed in bone marrow-derived and *ex vivo* cultured neutrophils by flow cytometry, from age- and sex-matched *Cxcr1*<sup>+/+</sup> and *Cxcr1*<sup>-/-</sup> mice.

## Supp. Figure 2

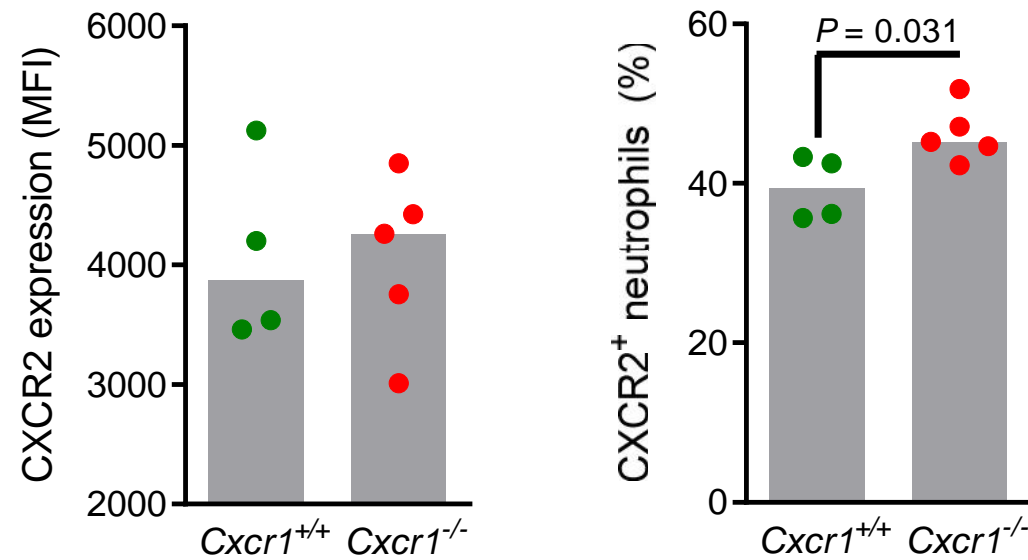

### Supplementary Figure 2: Cxcr2 expression

Cxcr2 surface expression was quantified on neutrophils isolated from the bone marrow of age- and sex-matched *Cxcr1*<sup>+/+</sup> and *Cxcr1*<sup>-/-</sup> mice. (Left panel) Cxcr2 expression is given as MFI (Right panel). The percentage of Cxcr2-expressing neutrophils is given. All bars represent medians.
